# Supplementary material for: Improving patients’, carers’ and primary care healthcare professionals’ experiences of discharge communication from specialist palliative care to community settings: a protocol for a qualitative interview study
Source: PubMed Central journal article supplement (PMC11191294; doi:10.1186/s12904-024-01451-1), 2024-06-20

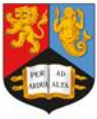

Centre/Site:

Improving patients', carers' and primary care healthcare professionals' experiences of discharge communication from specialist palliative care to community settings: a qualitative interview study

**Supplementary file 3 Study consent form**

# Participant Consent form

*Please tick boxes with black pen or, if using an electronic device, click boxes to "tick"*

- 1. I confirm that I have read the information sheet dated..... (version.....) for the above study. I have had the opportunity to consider the information, ask questions and have had these answered satisfactorily.
- 2. I understand that my participation is voluntary and that I am free to withdraw at any time without giving any reason, without my medical care being affected or (for healthcare professionals only) my employment rights being affected.
- 3. I understand that data collected during the study, may be shared and/or looked at by authorised individuals from the University of Birmingham and University of Warwick, or from regulatory authorities, where it is relevant to my taking part.
- 4. I understand that the information collected about me may be used to support other research in the future, and may be shared with other researchers anonymously.
- 5. I understand that the information collected about me may be shared anonymously (e.g. research publication), without use of my name or anything that identifies me. I understand this may include direct quotations.
- 6. I agree to be audio and/or video recorded for the study interview.
- 7. I agree to take part in this study

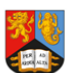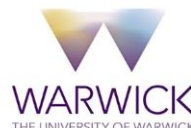



|                            |             |                                       |
|----------------------------|-------------|---------------------------------------|
|                            |             |                                       |
| <b>Name of participant</b> | <b>Date</b> | <b>Signature of participant/proxy</b> |

*If relevant* - Name and role (e.g. partner/carer) of proxy \_\_\_\_\_

|                                       |             |                  |
|---------------------------------------|-------------|------------------|
|                                       |             |                  |
| <b>Name of person seeking consent</b> | <b>Date</b> | <b>Signature</b> |

If you would like to hear about the study results, please provide your contact details:

\_\_\_\_\_

**Study Lead Investigators and contact details:**

Dr Katharine Weetman, University of Birmingham, Email: [k.e.weetman@bham.ac.uk](mailto:k.e.weetman@bham.ac.uk)  
Dr John MacArtney, University of Warwick, Email: [John.Macartney@warwick.ac.uk](mailto:John.Macartney@warwick.ac.uk)

When completed: 1 for participant (optional); 1 for researcher site file.

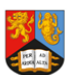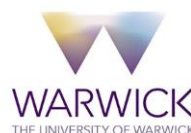

Supplement: 12904_2024_1451_MOESM3_ESM.pdf [file 12904_2024_1451_MOESM3_ESM.pdf]
